# Supplementary material for: Mechanistic Study on Gold-Like Luster Development of Solution-Cast Oligo(3-methoxythiophene) Film
Source: MDPI journal article supplement (doi:10.3390/coatings11070861), 2021-07-18
Supplement: s1 [file s1]

Archive with 1 entries (1 files):
- coatings-1284651-supplementary.pdf
