# Supplementary material for: Mechanistic Study on Gold-Like Luster Development of Solution-Cast Oligo(3-methoxythiophene) Film
Source: MDPI journal article supplement (doi:10.3390/coatings11070861), 2021-07-18
Supplement: s1 [file s1 › coatings-1284651-supplementary.pdf]

## Article

# Mechanistic Study on Gold-Like Luster Development of Solution-Cast Oligo(3-methoxythiophene) Film

Minako Kubo <sup>1</sup>, Minako Tachiki <sup>1</sup>, Terumasa Mitogawa <sup>1</sup>, Kota Saito <sup>1</sup>, Ryota Saito <sup>1</sup>, Satoru Tsukada <sup>1</sup>, Takahiko Horiuchi <sup>2</sup> and Katsuyoshi Hoshino <sup>1,\*</sup>

<sup>1</sup> Department of Materials Science, Graduate School of Engineering, Chiba University, 1-33 Yayoi-cho, Inage-ku, Chiba 263-8522, Japan; qminako@yahoo.co.jp (M.K.); m\_maruo@chiba-u.jp (M.T.); goemonn29@gmail.com (T.M.); kota.saito0107@gmail.com (K.S.); kp.ryo007@chiba-u.jp (R.S.); tsukada@chiba-u.jp (S.T.)

<sup>2</sup> Department of Imaging Sciences, Graduate School of Engineering, Chiba University, 1-33 Yayoi-cho, Inage-ku, Chiba 263-8522, Japan; horiuchi@faculty.chiba-u.jp

\* Correspondence: k\_hoshino@faculty.chiba-u.jp

## Specular Reflection Spectrum of the O3MeOT Film

The specular reflection spectrum of the O3MeOT film is shown in Figure S1. The reflection spectrum was obtained using a spectrometer (MSV-379, Jasco, Oklahoma City, OK, USA) with incident and reflection angles of 23° from normal. The spectrum was recorded at 23°C using a vacuum-evaporated aluminum film as the reference material. The film strongly reflected yellow light (570–590 nm), orange light (590–620 nm), and red light (620–750 nm), yet only slightly reflected green light (495–570 nm). These reflective characteristics are similar to those of the evaporated metallic gold film, justifying the gold-like appearances of the O3MeOT film.

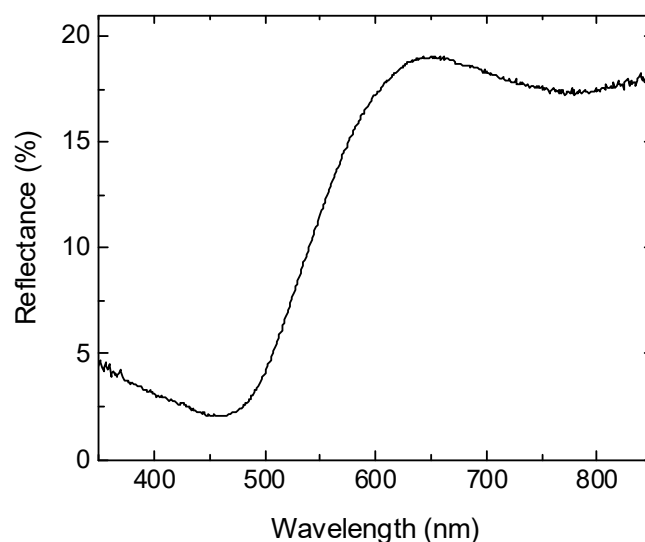

**Figure S1.** Specular reflection spectrum of the O3MeOT film coated on a glass plate.

**Citation:** Kubo, M.; Tachiki, M.; Mitogawa, T.; Saito, K.; Saito, R.; Tsukada, S.; Horiuchi, T.; Hoshino, K. Mechanistic Study on Gold-Like Luster Development of Solution-Cast Oligo(3-methoxythiophene) Film. *Coatings* **2021**, *11*, 861. <https://doi.org/10.3390/coatings11070861>

Academic Editor: Gianni Barucca

Received: 18 June 2021

Accepted: 15 July 2021

Published: 18 July 2021

**Publisher's Note:** MDPI stays neutral with regard to jurisdictional claims in published maps and institutional affiliations.

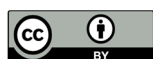

**Copyright:** © 2021 by the authors. Licensee MDPI, Basel, Switzerland. This article is an open access article distributed under the terms and conditions of the Creative Commons Attribution (CC BY) license (<http://creativecommons.org/licenses/by/4.0/>).
